# Supplementary material
Source: PubMed Central journal article supplement (PMC6193391)
Supplement: zam021188824s1.pdf [file zam021188824s1.pdf]

2 **Supplementary Tables**

3  
4  
5

**Table S1 Summary of genes with 2-fold or greater changes in mRNA expression under different PAHs treatment**

| <i>COG</i>      |                                                              | <i>All genes in the whole genome</i> |          | <i>Genes induced by one or more PAHs</i> |          | <i>Genes induced by all three PAHs</i> |          |
|-----------------|--------------------------------------------------------------|--------------------------------------|----------|------------------------------------------|----------|----------------------------------------|----------|
| <b>Category</b> | <b>Function</b>                                              | <i>Number</i>                        | <i>%</i> | <i>Number</i>                            | <i>%</i> | <i>Number</i>                          | <i>%</i> |
| A               | RNA processing and modification                              | 1                                    | 0.04     | 1                                        | 0.09     | 0                                      | 0.00     |
| J               | Translation, ribosomal structure and biogenesis              | 105                                  | 4.65     | 58                                       | 5.45     | 15                                     | 2.87     |
| K               | Transcription                                                | 32                                   | 1.42     | 15                                       | 1.41     | 5                                      | 0.96     |
| L               | Replication, recombination and repair                        | 36                                   | 1.60     | 12                                       | 1.13     | 4                                      | 0.77     |
| D               | Cell cycle control, cell division, chromosome partitioning   | 12                                   | 0.53     | 5                                        | 0.47     | 4                                      | 0.77     |
| M               | Cell wall/membrane/envelope biogenesis                       | 31                                   | 1.37     | 15                                       | 1.41     | 8                                      | 1.53     |
| N               | Cell motility                                                | 19                                   | 0.84     | 15                                       | 1.41     | 14                                     | 2.68     |
| O               | Posttranslational modification, protein turnover, chaperones | 43                                   | 1.91     | 26                                       | 2.44     | 19                                     | 3.64     |
| T               | Signal transduction mechanisms                               | 15                                   | 0.66     | 9                                        | 0.85     | 5                                      | 0.96     |

|             |                                                               |      |      |      |      |     |      |
|-------------|---------------------------------------------------------------|------|------|------|------|-----|------|
| U           | Intracellular trafficking, secretion, and vesicular transport | 22   | 0.98 | 12   | 1.13 | 9   | 1.72 |
| V           | Defense mechanisms                                            | 16   | 0.71 | 6    | 0.56 | 3   | 0.57 |
| C           | Energy production and conversion                              | 81   | 3.59 | 39   | 3.66 | 19  | 3.64 |
| E           | Amino acid transport and metabolism                           | 98   | 4.34 | 36   | 3.38 | 20  | 3.83 |
| F           | Nucleotide transport and metabolism                           | 34   | 1.51 | 17   | 1.60 | 10  | 1.92 |
| G           | Carbohydrate transport and metabolism                         | 19   | 0.84 | 8    | 0.75 | 4   | 0.77 |
| H           | Coenzyme transport and metabolism                             | 47   | 2.08 | 18   | 1.69 | 7   | 1.34 |
| I           | Lipid transport and metabolism                                | 43   | 1.91 | 25   | 2.35 | 9   | 1.72 |
| P           | Inorganic ion transport and metabolism                        | 63   | 2.79 | 31   | 2.91 | 16  | 3.07 |
| Q           | Secondary metabolites biosynthesis, transport and catabolism  | 24   | 1.06 | 13   | 1.22 | 3   | 0.57 |
| R           | General function prediction only                              | 79   | 3.50 | 24   | 2.25 | 10  | 1.92 |
| S           | Function unknown                                              | 55   | 2.44 | 29   | 2.72 | 15  | 2.87 |
| Not in COGs | Unclassified proteins                                         | 1381 |      | 651  |      | 323 |      |
| Total       |                                                               | 2256 |      | 1065 |      | 522 |      |

**Table S2 PAHs degradation gene clusters in *Cycloclasticus* sp. P1**

| GenBank accession No. | Putative function                                                                                              | Protein similarity (%) | Organism                                |
|-----------------------|----------------------------------------------------------------------------------------------------------------|------------------------|-----------------------------------------|
| <i>Cluster A</i>      |                                                                                                                |                        |                                         |
| <b>Q91_0500</b>       | Ring hydroxylating dioxygenase, alpha subunit: Rieske (2Fe-2S) region protein ( <b>RHD-5</b> $\alpha$ subunit) | 52.5                   | <i>Roseovarius</i> sp. 217              |
| <b>Q91_0501</b>       | Benzoate 1,2-dioxygenase small subunit ( <b>RHD-5</b> $\beta$ subunit)                                         | 42.24                  | <i>Pseudomonas fulva</i> 12-X           |
| <b>Q91_0502</b>       | NADH:ubiquinone oxidoreductase, na translocating, f subunit                                                    | 37.68                  | <i>Fervidobacterium nodosum</i> Rt17-B1 |
| <b>Q91_0503</b>       | ferredoxin-like protein                                                                                        | 38.53                  | <i>Acidovorax</i> sp. JS42              |
| <b>Q91_0504</b>       | Metapyrocatechase (MPC) (CatO2ase) (Catechol 2,3-dioxygenase)                                                  | 66.24                  | <i>Comamonas testosteroni</i> S44       |
| <b>Q91_0505</b>       | Catechol 2,3 dioxygenase, Xyle                                                                                 | 57.24                  | <i>Marinobacter adhaerens</i> HP15      |
| <b>Q91_0506</b>       | Hypothetical CmpX-like protein                                                                                 | 44.53                  | <i>Geobacillus</i> sp. Y4.1MC1          |
| <b>Q91_0507</b>       | 2-hydroxymuconic semialdehyde dehydrogenase                                                                    | 69.96                  | <i>Marinobacter algicola</i> DG893      |
| <b>Q91_0508</b>       | 2-hydroxypent-2,4-dienoate hydratase                                                                           | 68.85                  | <i>Cupriavidus metallidurans</i> CH34   |

|                  |                                                                                                         |       |                                         |
|------------------|---------------------------------------------------------------------------------------------------------|-------|-----------------------------------------|
| <b>Q91_0509</b>  | Acetaldehyde dehydrogenase 2/3                                                                          | 78.98 | <i>Azoarcus</i> sp. BH72                |
| <b>Q91_0510</b>  | 4-hydroxy-2-oxovalerate aldolase NahM                                                                   | 72.29 | <i>Alkalilimnicola ehrlichii</i> MLHE-1 |
| <b>Q91_0511</b>  | 4-oxalocrotonate decarboxylase NahK                                                                     | 73.85 | <i>Acinetobacter</i> sp. YAA            |
| <b>Q91_0512</b>  | 4-oxalocrotonate tautomerase family enzyme                                                              | 69.84 | <i>Azoarcus</i> sp. BH72                |
| <b>Q91_0513</b>  | hypothetical protein                                                                                    |       |                                         |
| <b>Q91_0514</b>  | bacterial luciferase-like oxidoreductase protein                                                        | 45.07 | <i>Marinomonas</i> sp. MWYL1            |
| <b>Q91_0515</b>  | Alpha/beta hydrolase fold protein                                                                       | 68.01 | <i>Comamonas testosteroni</i> CNB-2     |
| <b>Cluster B</b> |                                                                                                         |       |                                         |
| <b>Q91_0868</b>  | CRP/FNR family transcriptional regulator                                                                | 29.82 | <i>Thiocapsa roseopersicina</i>         |
| <b>Q91_0869</b>  | ABC transporter, permease protein                                                                       | 39.02 | <i>Nitrosomonas</i> sp. AL212           |
| <b>Q91_0870</b>  | Aromatic-ring-hydroxylating dioxygenase, alpha subunit-like protein<br>( <b>RHD-4</b> $\alpha$ subunit) | 39.77 | <i>Novosphingobium</i> sp. PP1Y         |
| <b>Q91_0871</b>  | Biphenyl dioxygenase subunit beta ( <b>RHD-4</b> $\beta$ subunit)                                       | 36.05 | <i>Pandoraea pnomenusa</i>              |
| <b>Q91_0872</b>  | Fumarate reductase/succinate dehydrogenase flavoprotein domain protein                                  | 59.42 | <i>Mycobacterium vanbaalenii</i> PYR-1  |

|                  |                                                                                      |       |                                          |
|------------------|--------------------------------------------------------------------------------------|-------|------------------------------------------|
| <b>Q91_0873</b>  | 4Fe-4S ferredoxin, iron-sulfur binding domain protein                                | 68.83 | <i>Mycobacterium</i> sp. KMS             |
| <b>Q91_0874</b>  | hypothetical protein                                                                 | 49.15 | <i>Mycobacterium</i> sp. JLS             |
| <b>Q91_0875</b>  | ring-hydroxylating dioxygenase large subunit( <b>RHD-1</b> $\alpha$ subunit)         | 64.42 | <i>Mycobacterium</i> sp. S65             |
| <b>Q91_0876</b>  | Aromatic-ring-hydroxylating dioxygenase, beta subunit( <b>RHD-1</b> $\beta$ subunit) | 52.63 | <i>Mycobacterium</i> sp. KMS             |
| <b>Q91_0877</b>  | Alcohol dehydrogenase, zinc-binding domain protein                                   | 46.92 | <i>Mycobacterium</i> sp. KMS             |
| <b>Q91_0878</b>  | hypothetical protein                                                                 | 26.67 | <i>Marinobacter aquaeolei</i> VT8        |
| <b>Q91_0879</b>  | hypothetical protein                                                                 | 29.4  | <i>Methylibium petroleiphilum</i> PM1    |
| <b>Q91_0880</b>  | Photosystem II stability/assembly factor-like protein                                | 27.23 | <i>Methylibium petroleiphilum</i> PM1    |
| <b>Q91_0881</b>  | Multidrug efflux transporter                                                         | 33.11 | marine gamma proteobacterium<br>HTCC2080 |
| <b>Q91_0882</b>  | 2-hydroxy-6-oxononadienedioate/2-hydroxy-6-oxononatrienedioate<br>hydrolase 1        | 67.38 | <i>Burkholderia</i> sp. H160             |
| <b>Q91_0883</b>  | Glutathione S-transferase                                                            | 46.22 | <i>Colwellia psychrerythraea</i> 34H     |
| <b>Q91_0884</b>  | Site-specific recombinase, phage integrase family protein                            | 36.43 | <i>Methylophaga thiooxidans</i> DMS010   |
| <b>Cluster C</b> |                                                                                      |       |                                          |

|                 |                                                                                                       |       |                                                                        |
|-----------------|-------------------------------------------------------------------------------------------------------|-------|------------------------------------------------------------------------|
| <b>Q91_0959</b> | Antibiotic biosynthesis monooxygenase subfamily                                                       | 35.48 | <i>Clavibacter michiganensis</i> subsp. <i>michiganensis</i> NCPPB 382 |
| <b>Q91_0960</b> | Efflux transporter, RND family, MFP subunit                                                           | 34.12 | <i>Thiobacillus denitrificans</i> ATCC 25259                           |
| <b>Q91_0961</b> | RND transporter, HAE1/HME family, permease protein                                                    | 36.81 | <i>Pseudomonas entomophila</i> L48                                     |
| <b>Q91_0962</b> | Transcriptional regulator, TetR family                                                                | 28.57 | <i>Alcanivorax borkumensis</i> SK2                                     |
| <b>Q91_0963</b> | Biphenyl-2,3-diol 1,2-dioxygenase ( <b>RHD-6</b> $\beta$ subunit)                                     | 47.4  | <i>Bacillus tusciae</i> DSM 2912                                       |
| <b>Q91_0964</b> | Ring hydroxylating dioxygenase, alpha subunit/Rieske (2Fe-2S) protein( <b>RHD-6</b> $\alpha$ subunit) | 49.63 | <i>Sphingobium japonicum</i> UT26                                      |
| <b>Q91_0965</b> | Alpha/beta hydrolase fold protein                                                                     | 58.11 | <i>Sphingomonas</i> sp. KA1                                            |
| <b>Q91_0966</b> | Aromatic oxygenase small subunit                                                                      | 50.66 | <i>Sphingomonas</i> sp. DN1                                            |
| <b>Q91_0967</b> | Carbazole dioxygenase subunit                                                                         | 57.89 | <i>Pseudomonas stutzeri</i>                                            |
| <b>Q91_0968</b> | Toluate 1,2-dioxygenase subunit alpha                                                                 | 43.68 | <i>Corynebacterium efficiens</i> YS-314                                |
| <b>Q91_0969</b> | Small subunit of terminal oxygenase component of anthranilate 1,2-dioxygenase                         | 37.75 | <i>Pseudomonas resinovorans</i>                                        |
| <b>Q91_0970</b> | hypothetical protein                                                                                  |       |                                                                        |

|                  |                                                                                                         |       |                                                |
|------------------|---------------------------------------------------------------------------------------------------------|-------|------------------------------------------------|
| <b>Q91_0971</b>  | hypothetical protein                                                                                    | 26.3  | <i>Marinobacter aquaeolei</i> VT8              |
| <b>Q91_0972</b>  | hypothetical protein                                                                                    | 29.61 | marine gamma proteobacterium<br>HTCC2080       |
| <b>Q91_0973</b>  | 3-hydroxyisobutyrate dehydrogenase family protein                                                       | 31.32 | delta proteobacterium NaphS2                   |
| <b>Q91_0974</b>  | Fnr-like transcriptional activator                                                                      | 45.37 | <i>Beggiatoa</i> sp. PS                        |
| <b>Q91_0975</b>  | hydroxylamine reductase                                                                                 | 62.77 | <i>Methylobacter tundripaludum</i> SV96        |
| <b>Q91_0976</b>  | Aromatic-ring-hydroxylating dioxygenase, alpha subunit-like protein<br>( <b>RHD-7</b> $\alpha$ subunit) | 53.83 | <i>Sphingomonas</i> sp. LH128                  |
| <b>Q91_0977</b>  | PAH dioxygenase iron sulfur protein small subunit ( <b>RHD-7</b> $\beta$ subunit)                       | 39.31 | <i>Cycloclasticus</i> sp. A5                   |
| <b>Q91_0978</b>  | Transcriptional regulator, FNR-like                                                                     | 36.24 | marine gamma proteobacterium<br>HTCC2143       |
| <b>Cluster D</b> |                                                                                                         |       |                                                |
| <b>Q91_2170</b>  | Aromatic ring-opening dioxygenase catalytic subunit LigB                                                | 50.6  | <i>Acetobacter pasteurianus</i> IFO<br>3283-01 |
| <b>Q91_2171</b>  | Short-chain dehydrogenase/reductase SDR                                                                 | 48.48 | delta proteobacterium NaphS2                   |

|                 |                                                                                                      |       |                                              |
|-----------------|------------------------------------------------------------------------------------------------------|-------|----------------------------------------------|
| <b>Q91_2172</b> | Short-chain dehydrogenase/reductase SDR                                                              | 45.1  | <i>Bordetella petrii</i> DSM 12804           |
| <b>Q91_2173</b> | Aromatic-ring-hydroxylating dioxygenase, beta subunit( <b>RHD-8</b> $\beta$ subunit)                 | 41.18 | <i>Sphingobium chlorophenolicum</i> L-1      |
| <b>Q91_2174</b> | Aromatic-ring-hydroxylating dioxygenase, alpha subunit-like protein ( <b>RHD-8</b> $\alpha$ subunit) | 49.54 | <i>Novosphingobium</i> sp. PP1Y              |
| <b>Q91_2175</b> | Glutathione S-transferase domain                                                                     | 38.38 | <i>Methylobacterium chloromethanicum</i> CM4 |
| <b>Q91_2176</b> | Short-chain dehydrogenase/reductase SDR                                                              | 46.12 | <i>Caulobacter</i> sp. K31                   |
| <b>Q91_2177</b> | hypothetical protein                                                                                 | 34.12 | <i>Frankia</i> sp. EuI1c                     |
| <b>Q91_2178</b> | Rieske (2Fe-2S) iron-sulfur domain protein                                                           | 35.26 | <i>Oceanicola batsensis</i> HTCC2597         |
| <b>Q91_2179</b> | NAD(P)H dehydrogenase                                                                                | 55.56 | <i>Desulfotalea psychrophila</i> Lsv54       |
| <b>Q91_2180</b> | Short-chain dehydrogenase/reductase SDR                                                              | 62.84 | <i>Ralstonia pickettii</i> 12D               |
| <b>Q91_2181</b> | UbiA prenyltransferase family protein                                                                | 46.84 | <i>Colwellia psychrerythraea</i> 34H         |
| <b>Q91_2182</b> | Disulfide bond formation protein                                                                     | 50    | <i>Oceanospirillum</i> sp. MED92             |
| <b>Q91_2183</b> | PhoH-like protein                                                                                    | 50.23 | <i>Methylobacterium nodulans</i> ORS 2060    |



|                 |                                                      |       |                                        |
|-----------------|------------------------------------------------------|-------|----------------------------------------|
| <b>Q91_2184</b> | Nucleotide sugar dehydrogenase subfamily             | 70.26 | <i>Thiomicrospira crunogena</i> XCL-2  |
| <b>Q91_2185</b> | hypothetical protein                                 | 57.71 | <i>Marinobacter</i> sp. ELB17          |
| <b>Q91_2186</b> | phosphatidylserine decarboxylase                     | 56.04 | <i>Marinobacter</i> sp. ELB17          |
| <b>Q91_2187</b> | hypothetical protein                                 | 60.41 | <i>Marinobacter</i> sp. ELB17          |
| <b>Q91_2188</b> | Aminotransferase class-III                           | 57.22 | <i>Marinobacter</i> sp. ELB17          |
| <b>Q91_2189</b> | Ibuprofen CoA ligase                                 | 43.98 | <i>Sphingomonas</i> sp. Ibu-2          |
| <b>Q91_2190</b> | hypothetical protein                                 | 40    | <i>Desulfarculus baarsii</i> DSM 2075  |
| <b>Q91_2191</b> | thiolase/acyl transferase                            | 45    | <i>Sphingomonas</i> sp. Ibu-2          |
| <b>Q91_2192</b> | Aromatic-ring-hydroxylating dioxygenase beta subunit | 47.27 | <i>Burkholderia</i> sp. Ch1-1          |
| <b>Q91_2193</b> | ibuprofen CoA dioxygenase large subunit              | 53.19 | <i>Sphingomonas</i> sp. Ibu-2          |
| <b>Q91_2194</b> | transmembrane alkane 1-monooxygenase AlkB            | 33.89 | <i>Conexibacter woesei</i> DSM 14684   |
| <b>Q91_2195</b> | Alpha/beta hydrolase fold-containing protein         | 41.94 | <i>Thermomicrobium roseum</i> DSM 5159 |
| <b>Q91_2196</b> | Ring hydroxylating dioxygenase, alpha subunit/Rieske | 53.75 | <i>Methylocella silvestris</i> BL2     |

| <i>Cluster E</i> |                                                                                    |       |                                    |
|------------------|------------------------------------------------------------------------------------|-------|------------------------------------|
| <b>Q91_2218</b>  | Isomerase                                                                          | 60.2  | <i>Burkholderia</i> sp. DBT1       |
| <b>Q91_2219</b>  | PAH dioxygenase component ferredoxin                                               | 100   | <i>Cycloclasticus</i> sp. A5       |
| <b>Q91_2220</b>  | PAH dioxygenase component ferredoxin reductase                                     | 100   | <i>Cycloclasticus</i> sp. A5       |
| <b>Q91_2221</b>  | hypothetical protein                                                               | 97.37 | <i>Cycloclasticus</i> sp. A5       |
| <b>Q91_2222</b>  | Tryptophan synthase b subunit                                                      | 98.72 | <i>Cycloclasticus</i> sp. A5       |
| <b>Q91_2223</b>  | hypothetical protein                                                               | 48.85 | <i>Beggiatoa</i> sp. PS            |
| <b>Q91_2224</b>  | ring cleavage dioxygenase                                                          | 100   | <i>Cycloclasticus</i> sp. A5       |
| <b>Q91_2225</b>  | PAH dioxygenase iron sulfur protein small subunit( <b>RHD-3</b> $\beta$ subunit)   | 100   | <i>Cycloclasticus</i> sp. A5       |
| <b>Q91_2226</b>  | PAH dioxygenase iron sulfur protein large subunit ( <b>RHD-3</b> $\alpha$ subunit) | 99.78 | <i>Cycloclasticus</i> sp. A5       |
| <b>Q91_2227</b>  | Aromatic dioxygenase large subunit                                                 | 94.96 | <i>Cycloclasticus</i> sp. A5       |
| <b>Q91_2228</b>  | 4-hydroxythreonine-4-phosphate dehydrogenase                                       | 98.46 | <i>Cycloclasticus</i> sp. A5       |
| <b>Q91_2229</b>  | hypothetical protein                                                               | 54.33 | <i>Novosphingobium</i> sp. PP1Y    |
| <b>Q91_2230</b>  | Aromatic-ring-hydroxylating dioxygenase beta subunit                               | 51.28 | <i>Methylocella silvestris</i> BL2 |

|                 |                                                                                       |       |                                           |
|-----------------|---------------------------------------------------------------------------------------|-------|-------------------------------------------|
| <b>Q91_2231</b> | Biphenyl dioxygenase large subunit                                                    | 53.14 | <i>Methylocella silvestris</i> BL2        |
| <b>Q91_2232</b> | transcriptional regulator, Crp/Fnr family                                             | 34.18 | <i>Marinobacter adhaerens</i> HP15        |
| <b>Q91_2233</b> | Ring hydroxylating dioxygenase alpha subunit ( <b>RHD-9</b> $\alpha$ subunit)         | 57.11 | <i>Sphingomonas</i> sp. P2                |
| <b>Q91_2234</b> | Aromatic-ring-hydroxylating dioxygenase, beta subunit ( <b>RHD-9</b> $\beta$ subunit) | 34.21 | <i>Mycobacterium</i> sp. JLS              |
| <b>Q91_2235</b> | Short-chain dehydrogenase/reductase SDR                                               | 55.94 | <i>Sphingobium xenophagum</i>             |
| <b>Q91_2236</b> | Alcohol dehydrogenase large subunit                                                   | 51.67 | <i>Bradyrhizobium japonicum</i> USDA 110  |
| <b>Q91_2237</b> | hypothetical protein                                                                  | 21.63 | <i>Methylibium petroleiphilum</i> PM1     |
| <b>Q91_2238</b> | hypothetical protein                                                                  | 24.02 | uncultured <i>Desulfobacterium</i> sp.    |
| <b>Q91_2239</b> | Multidrug efflux transporter                                                          | 28.75 | <i>Azoarcus</i> sp. BH72                  |
| <b>Q91_2240</b> | Glycosyl hydrolase, BNR repeat                                                        | 38.24 | <i>Candidatus Poribacteria</i> sp. WGA-A3 |
| <b>Q91_2241</b> | Alcohol dehydrogenase, zinc-binding domain protein                                    | 48.28 | <i>Rhodospirillum centenum</i> SW         |
| <b>Q91_2242</b> | Permease, drug/metabolite transporter superfamily                                     | 27.52 | <i>Bacillus</i> sp. 2_A_57_CT2            |
| <b>Q91_2243</b> | Aromatic-ring-hydroxylating dioxygenase, beta subunit ( <b>RHD-2</b> $\beta$ subunit) | 48.31 | <i>Novosphingobium aromaticivorans</i>    |

|                 |                                                                                                         |       |                                            |
|-----------------|---------------------------------------------------------------------------------------------------------|-------|--------------------------------------------|
| <b>Q91_2244</b> | Aromatic-ring-hydroxylating dioxygenase, alpha subunit-like protein<br>( <b>RHD-2</b> $\alpha$ subunit) | 64.98 | <i>Novosphingobium sp. PPIY</i>            |
| <b>Q91_2245</b> | Toluate 1,2-dioxygenase electron transfer component                                                     | 57.36 | <i>Achromobacter piechaudii</i> ATCC 43553 |
| <b>Q91_2246</b> | Glutathione s-transferase protein                                                                       | 42.23 | <i>Burkholderia ubonensis</i> Bu           |
| <b>Q91_2247</b> | hypothetical protein                                                                                    | 38.41 | <i>Methylomonas methanica</i> MC09         |
| <b>Q91_2248</b> | Transglutaminase domain protein                                                                         | 35.8  | <i>Sideroxydans lithotrophicus</i> ES-1    |
| <b>Q91_2249</b> | Nitroreductase family protein                                                                           | 69.72 | <i>Colwellia psychrerythraea</i> 34H       |
| <b>Q91_2250</b> | FadL family outer membrane protein                                                                      | 33.71 | <i>Oceanicaulis alexandrii</i> HTCC2633    |
| <b>Q91_2251</b> | outer membrane protein transport protein                                                                | 26.73 | <i>Desulfovibrio sp.</i> ND132             |

7

8

9

10

11

12

**Table S3 Genes in the pyrene degradation pathway of *Cycloclasticus* sp. P1**

| GenBank<br>accession No. | Putative function                                              | Protein<br>similarity<br>(%) | Organism                                  | Differential<br>expression<br>Ratio(Pyrene/CK<br>) | P-value<br>log2 |
|--------------------------|----------------------------------------------------------------|------------------------------|-------------------------------------------|----------------------------------------------------|-----------------|
| <b>Q91_0875</b>          | Pyrene ring-hydroxylating oxygenase,<br>RHD-1 $\alpha$ subunit | 64.42                        | <i>Mycobacterium</i> sp. S65              | 4.613                                              | 0.0000091       |
| <b>Q91_0876</b>          | Pyrene ring-hydroxylating oxygenase,<br>RHD-1 $\beta$ subunit  | 52.63                        | <i>Mycobacterium</i> sp. KMS              | 4.176                                              | 0.0000015       |
| <b>Q91_2219</b>          | PAH dioxygenase component<br>ferredoxin                        | 100                          | <i>Cycloclasticus</i> sp. A5              | 3.929                                              | 0.00004         |
| <b>Q91_2220</b>          | PAH dioxygenase component<br>ferredoxin reductase              | 100                          | <i>Cycloclasticus</i> sp. A5              | 3.765                                              | 0.00013         |
| <b>Q91_0872</b>          | Dihydrodiol dehydrogenase                                      | 59.42                        | <i>Mycobacterium vanbaalenii</i><br>PYR-1 | 2.733                                              | 0.00005         |
| <b>Q91_2224</b>          | Ring cleavage dioxygenase                                      | 100                          | <i>Cycloclasticus</i> sp. A5              | 2.017                                              | 0.00072         |
| <b>Q91_1047</b>          | Decarboxylase                                                  | 64.95                        | <i>Methylophaga thiooxidans</i><br>DMS010 | 2.583                                              | 0.000043        |
| <b>Q91_0870</b>          | dioxygenase, $\alpha$ -subunit                                 | 39.72                        | <i>Novosphingobium</i> sp. PP1Y           | 2.414                                              | 0.000058        |

|                 |                               |       |                                                            |       |          |
|-----------------|-------------------------------|-------|------------------------------------------------------------|-------|----------|
| <b>Q91_0871</b> | dioxygenase, $\beta$ -subunit | 36.05 | <i>Pseudomonas extremaustralis</i><br>14-3                 | 1.369 | 0.000059 |
| <b>Q91_0872</b> | Dihydrodiol dehydrogenase     | 59.42 | <i>Mycobacterium vanbaalenii</i><br>PYR-1                  | 2.733 | 0.000069 |
| <b>Q91_2218</b> | isomerase                     | 60.2  | <i>Burkholderia</i> sp. DBT1                               | 3.188 | 0.00038  |
| <b>Q91_1157</b> | hydratase-aldolase            | 58.05 | <i>Burkholderia</i> sp. Ch1-1                              | 2.359 | 0.000052 |
| <b>Q91_0507</b> | Aldehyde dehydrogenase        | 69.96 | <i>Marinobacter algicola</i> DG893                         | 1.183 | 0.000068 |
| <b>Q91_0344</b> | hydroxylase                   | 60.62 | <i>Pseudoalteromonas atlantica</i><br>T6c                  | 1.231 | 0.000065 |
| <b>Q91_0437</b> | HBPA hydratase-aldolase       | 64.36 | <i>Methylobacter tundripaludum</i><br>SV96                 | 1.414 | 0.000062 |
| <b>Q91_0488</b> | Salicylaldehyde dehydrogenase | 56.48 | <i>Novosphingobium</i><br><i>aromaticivorans</i> DSM 12444 | 1.355 | 0.00015  |
| <b>Q91_1959</b> | salicylaldehyde hydroxylase   | 44.61 | <i>Methylobacter tundripaludum</i><br>SV96                 | 1.066 | 0.00059  |

14

15

16

**Table S4 Genes in the phenanthrene degradation pathway of *Cycloclasticus* sp. P1**

| GenBank accession No. | Putative function                                                 | Protein similarity (%) | Organism                               | Differential expression           |            |
|-----------------------|-------------------------------------------------------------------|------------------------|----------------------------------------|-----------------------------------|------------|
|                       |                                                                   |                        |                                        | Log <sub>2</sub> (Ratio Phe / CK) | P-value    |
| <b>Q91_2243</b>       | Phenanthrene ring-hydroxylating oxygenase, RHD-2 $\alpha$ subunit | 48.31                  | <i>Novosphingobium aromaticivorans</i> | 4.891                             | 0.0000073  |
| <b>Q91_2244</b>       | Phenanthrene ring-hydroxylating oxygenase, RHD-2 $\beta$ subunit  | 64.98                  | <i>Novosphingobium</i> sp. PP1Y        | 4.248                             | 0.00000017 |
| <b>Q91_2219</b>       | PAH dioxygenase component ferredoxin                              | 100                    | <i>Cycloclasticus</i> sp. A5           | 3.133                             | 0.0000028  |
| <b>Q91_2220</b>       | PAH dioxygenase component ferredoxin reductase                    | 100                    | <i>Cycloclasticus</i> sp. A5           | 3.400                             | 0.000005   |
| <b>Q91_2235</b>       | Dihydrodiol dehydrogenase                                         | 55.94                  | <i>Sphingobium xenophagum</i>          | 1.623                             | 0.000045   |
| <b>Q91_2224</b>       | Ring cleavage dioxygenase                                         | 100                    | <i>Cycloclasticus</i> sp. A5           | 2.348                             | 0.000067   |
| <b>Q91_2218</b>       | isomerase                                                         | 60.2                   | <i>Burkholderia</i> sp. DBT1           | 1.696                             | 0.0000075  |
| <b>Q91_1157</b>       | hydratase-aldolase                                                | 58.05                  | <i>Burkholderia</i> sp. Ch1-1          | 2.099                             | 0.0000337  |
| <b>Q91_0507</b>       | Aldehyde dehydrogenase                                            | 69.96                  | <i>Marinobacter algicola</i><br>DG893  | 2.360                             | 0.000002   |
| <b>Q91_0344</b>       | hydroxylase                                                       | 60.62                  | <i>Pseudoalteromonas</i>               | 1.613                             | 0.000063   |

| <i>atlantica</i> T6c |                                        |       |                                                  |       |          |  |
|----------------------|----------------------------------------|-------|--------------------------------------------------|-------|----------|--|
| <b>Q91_2218</b>      | Hydroxy chromene-carboxylate isomerase | 60.2  | <i>Burkholderia</i> sp. DBT1                     | 1.696 | 0.000007 |  |
| <b>Q91_0437</b>      | HBPA hydratase-aldolase                | 64.36 | <i>Methylobacter tundripaludum</i> SV96          | 2.142 | 0.000109 |  |
| <b>Q91_0488</b>      | Salicylaldehyde dehydrogenase          | 56.48 | <i>Novosphingobium aromaticivorans</i> DSM 12444 | 1.170 | 0.00007  |  |
| <b>Q91_1959</b>      | salicylaldehyde hydroxylase            | 44.61 | <i>Methylobacter tundripaludum</i> SV96          | 1.034 | 0.00001  |  |

18

19

20

21

22

23

24



**TableS5 Genes in the naphthalene degradation pathway of *Cycloclasticus* sp. P1**

| GenBank accession No. | Putative function                                                | Protein similarity (%) | Organism                                         | Differential expression         |         |
|-----------------------|------------------------------------------------------------------|------------------------|--------------------------------------------------|---------------------------------|---------|
|                       |                                                                  |                        |                                                  | Log <sub>2</sub> (Ratio Nap/CK) | P-value |
| <b>Q91_2225</b>       | Naphthalene ring-hydroxylating oxygenase, RHD-3 $\alpha$ subunit | 100                    | <i>Cycloclasticus</i> sp. A5                     | 3.71                            | 0.0007  |
| <b>Q91_2226</b>       | Naphthalene ring-hydroxylating oxygenase, RHD-3 $\beta$ subunit  | 99.78                  | <i>Cycloclasticus</i> sp. A5                     | 3.522                           | 0.0002  |
| <b>Q91_2219</b>       | PAH dioxygenase component ferredoxin                             | 100                    | <i>Cycloclasticus</i> sp. A5                     | 3.105                           | 0.0001  |
| <b>Q91_2220</b>       | PAH dioxygenase component ferredoxin reductase                   | 100                    | <i>Cycloclasticus</i> sp. A5                     | 3.229                           | 0.0002  |
| <b>Q91_2228</b>       | Dihydrodiol dehydrogenase                                        | 98.46                  | <i>Cycloclasticus</i> sp. A5                     | 1.6 96                          | 0.00005 |
| <b>Q91_2224</b>       | ring cleavage dioxygenase                                        | 100                    | <i>Cycloclasticus</i> sp. A5                     | 1.458                           | 0.231   |
| <b>Q91_2218</b>       | Hydroxy chromene-carboxylate isomerase                           | 60.2                   | <i>Burkholderia</i> sp. DBT1                     | 1.410                           | 0.00003 |
| <b>Q91_0437</b>       | HBPA hydratase-aldolase                                          | 64.36                  | <i>Methylobacter tundripaludum</i> SV96          | 1.174                           | 0.00045 |
| <b>Q91_0488</b>       | Salicylaldehyde dehydrogenase                                    | 56.48                  | <i>Novosphingobium aromaticivorans</i> DSM 12444 | 1.592                           | 0.00004 |
| <b>Q91_1959</b>       | salicylaldehyde hydroxylase                                      | 44.61                  | <i>Methylobacter tundripaludum</i> SV96          | 1.235                           | 0.00012 |

26

27

28

**TableS6 Genes in the benzoate degradation pathway of *Cycloclasticus* sp. P1.**

| GenBank No.     | Putative function                                            | Protein similarity(%) | Organism                                   |
|-----------------|--------------------------------------------------------------|-----------------------|--------------------------------------------|
| <b>Q91_0500</b> | benzoate 1,2-dioxygenase subunit alpha                       | 52.5                  | <i>Roseovarius</i> sp. 217                 |
| <b>Q91_0501</b> | benzoate/toluate 1,2-dioxygenase subunit beta                | 42.24                 | <i>Pseudomonas fulva</i> 12-X              |
| <b>Q91_1667</b> | benzoate/toluate 1,2-dioxygenase electron transfer component | 42.47                 | <i>Acidiphilium multivorum</i> AIU301      |
| <b>Q91_2245</b> | dihydroxycyclohexadiene carboxylate dehydrogenase            | 57.36                 | <i>Achromobacter piechaudii</i> ATCC 43553 |
| <b>Q91_0505</b> | catechol 2,3-dioxygenase                                     | 57.24                 | <i>Marinobacter adhaerens</i> HP15         |
| <b>Q91_0515</b> | 2-hydroxymuconate-semialdehyde hydrolase                     | 68.01                 | <i>Comamonas testosteroni</i> CNB-2        |
| <b>Q91_0507</b> | aminomuconate-semialdehyde dehydrogenase                     | 69.96                 | <i>Marinobacter algicola</i> DG893         |
| <b>Q91_0512</b> | 4-oxalocrotonate tautomerase                                 | 69.84                 | <i>Azoarcus</i> sp. BH72                   |
| <b>Q91_0511</b> | 4-oxalocrotonate decarboxylase                               | 73.85                 | <i>Acinetobacter</i> sp. YAA               |

|                 |                                  |       |                                         |
|-----------------|----------------------------------|-------|-----------------------------------------|
| <b>Q91_0508</b> | 2-keto-4-pentenoate hydratase    | 68.85 | <i>Cupriavidus metallidurans</i> CH34   |
| <b>Q91_0510</b> | 4-hydroxy 2-oxovalerate aldolase | 72.29 | <i>Alkalilimnicola ehrlichii</i> MLHE-1 |
| <b>Q91_0509</b> | acetaldehyde dehydrogenase       | 78.98 | <i>Azoarcus</i> sp. BH72                |

29

30

**TableS7 Primers and vectors used or constructed in this study**

| <i>Primers /Plasmid</i> | <i>Relevant characteristics (Sequence)<sup>a</sup></i>                     | <i>Restriction enzyme</i> | <i>Reference or source</i> |
|-------------------------|----------------------------------------------------------------------------|---------------------------|----------------------------|
| <b>primers</b>          |                                                                            |                           |                            |
| Ferre_F                 | GAG <u>AGG ATC CTA</u> GAG AAG GAA ATT GAT GAG<br>CAA TAT AGT ATT ATG TAA  | <i>Bam</i> HI             | This study                 |
| Ferre_R                 | TCT <u>CGA GCT CTT</u> ATT CAG CGG CTG GAA TAC<br>AA                       | <i>Sac</i> I              | This study                 |
| Reduc_F                 | GAG <u>AGA GCT CAG</u> AAG GAT CCT GAT TTA TGA<br>CAA GTT ATA ACG TAA A AA | <i>Sac</i> I              | This study                 |
| Reduc_R1                | TCT <u>CAG ATC TTTA</u> ATA AAA ACG ATC GTA ATG<br>A                       | <i>Bgl</i> II             | This study                 |
| Reduc_R2                | TCT <u>CCT GCA GTTA</u> ATA AAA ACG ATC GTA ATG<br>A                       | <i>Pst</i> I              | This study                 |
| RHD-1_F                 | GAG <u>AAG ATC TAG</u> AAG GAA GCC CTA TCAT<br>GAC TGA TTT CGA AAA AAT TA  | <i>Bgl</i> II             | This study                 |
| RHD-1_R                 | TCT <u>CGA ATT CTT</u> ATA GTG GGT ACA CTA GAT<br>AC                       | <i>Eco</i> RI             | This study                 |

|         |                                                                            |                |            |
|---------|----------------------------------------------------------------------------|----------------|------------|
| RHD-2_F | GAG <u>AAG ATC TAG</u> AAG AAG GAG TTG ATA TGA<br>GCA ATA GAA GAC TTG AGA  | <i>Bgl</i> III | This study |
| RHD-2_R | TCT <u>CGA ATT CTT</u> AAA GGT AAA CGT TTA GAC<br>TT                       | <i>Eco</i> RI  | This study |
| RHD-3_F | GAG <u>AAG ATC TAG</u> AAG AAG AGA GTG AAA<br>TGG TAG ATA TTA ATA AAC TGG  | <i>Bgl</i> III | This study |
| RHD-3_R | TCT <u>CGA ATT CTC</u> AGA AGA ATA TAT ATA AAT TT                          | <i>Eco</i> RI  | This study |
| RHD-4_F | GAG <u>AAG ATC TAG</u> AAG AAG GAG TTG GCA<br>TGA TTG AGA TTG ATA AGC TGG  | <i>Bgl</i> III | This study |
| RHD-4_R | TCT <u>CGA ATT CCT</u> ACA ACA AAC TAT TCA TAT<br>TG                       | <i>Eco</i> RI  | This study |
| RHD-5_F | GAG <u>ACT GCA GAG</u> AAG AAA GGT GAA TAA<br>TGG GCA AAC AAA ATA AAA TCG  | <i>Pst</i> I   | This study |
| RHD-5_R | TCT <u>CGA ATT CCT</u> AAA CAC TAT AAA CAT CTA<br>AT                       | <i>Eco</i> RI  | This study |
| RHD-6_F | GAG <u>AAG ATC TAG</u> AAG AAG ATA CTG<br>CAATGAATTTAG ATCAATTAAC TC       | <i>Bgl</i> III | This study |
| RHD-6_R | TCT <u>CGA ATT CTT</u> ACT GAG TCA CAC CCA TAA<br>TT                       | <i>Eco</i> RI  | This study |
| RHD-7_F | GAG <u>AAG ATC TAG</u> AAG AAA TTA CAC ATA TGA<br>AGC CAG TTA ATA AAT TAA  | <i>Bgl</i> III | This study |
| RHD-7_R | TCT <u>CGA ATT CCT</u> AAAAGAAA CAGTGAATAT TT                              | <i>Eco</i> RI  | This study |
| RHD-8_F | GAG <u>ACT GCA GAG</u> AAG AAA GGC GGT GCA<br>TGA GTA AGT TTG ATT ACA A TA | <i>Pst</i> I   | This study |
| RHD-8_R | TCT <u>CGA ATT CCT</u> AGCCATTG ACAGACTCCT TC                              | <i>Eco</i> RI  | This study |

|                 |                                                                            |              |            |
|-----------------|----------------------------------------------------------------------------|--------------|------------|
| RHD-9_F         | GAG <u>ACT GCA GAG</u> AAG GAA GCC CTA TCA TGA<br>CGC AAA TAC CTA A TAA CA | <i>Pst</i> I | This study |
| RHD-9_R         | TCT <u>CGG TAC CTT</u> AG ATA GGG TAA GGA ACA<br>TAA                       | <i>Kpn</i> I | This study |
| <b>Plasmids</b> |                                                                            |              |            |
| pCR4-TOPO       | Amp <sup>r</sup> Kan <sup>r</sup> ; cloning vector for sequencing          |              | Invitrogen |
| pRSET-A         | Amp <sup>r</sup> ; vector for gene expression                              |              | Invitrogen |
| pFR.1           | pRSET-A vector with ferredoxin and<br>reductase genes                      |              | This study |
| pFRR.1          | pFR.1 containing $\alpha/\beta$ subunit genes of RHD-1                     |              | This study |
| pFRR.2          | pFR.1 containing $\alpha/\beta$ subunit genes of RHD-2                     |              | This study |
| pFRR.3          | pFR.1 containing $\alpha/\beta$ subunit genes of RHD-3                     |              | This study |
| pFRR.4          | pFR.1 containing $\alpha/\beta$ subunit genes of RHD-4                     |              | This study |
| pFRR.5          | pFR.1 containing $\alpha/\beta$ subunit genes of RHD-5                     |              | This study |
| pFRR.6          | pFR.1 containing $\alpha/\beta$ subunit genes of RHD-6                     |              | This study |
| pFRR.7          | pFR.1 containing $\alpha/\beta$ subunit genes of RHD-7                     |              | This study |
| pFRR.8          | pFR.1 containing $\alpha/\beta$ subunit genes of RHD-8                     |              | This study |

31

|        |                                                        |  |            |
|--------|--------------------------------------------------------|--|------------|
| pFRR.9 | pFR.1 containing $\alpha/\beta$ subunit genes of RHD-9 |  | This study |
|--------|--------------------------------------------------------|--|------------|
